# Supplementary material
Source: publisher figshare collection journal article supplement (https://acs.figshare.com/ndownloader/files/25741416)
Supplement: Supplementary file 1 [file 25741416]

# SUPPORTING INFORMATION

## Folic acid modified erythrocyte membrane loading dual drug for targeted and chemo-photothermal synergistic cancer therapy

*Zhihao Chen<sup>1‡</sup>, Wanting Wang<sup>1</sup>, Yusheng Li<sup>1</sup>, Cui Wei<sup>1</sup>, Ping Zhong<sup>1</sup>, Dahua He<sup>2‡</sup>,  
Huan Liu<sup>1</sup>, Pengfei Wang<sup>1</sup>, Zhenpeng Huang<sup>1</sup>, Wanye Zhu<sup>1</sup>, Yi Zhou<sup>3\*</sup>, Linghao Qin<sup>1\*</sup>*

1 School of Pharmacy, Guangdong Pharmaceutical University, Guangzhou, 510006, China

2 Department of Pharmacy, Guangdong Women and Children Hospital, Guangzhou, 510010, China

3 School of Pharmacy, Guangzhou Medical University, Guangzhou 510436, China

Corresponding Authors

\* E-mail: zhouyi\_gmu@126.com; Tel: +86-20-37103268 (Y. Z.)

qins\_lab@163.com; Tel: +86-20-39352117 (L.Q.)

‡ Both authors contributed equally

**Optimization of preparation parameters.** Single influence factor experiment was used to optimize the preparation parameters, the entrapment efficiency (EE%), drug loading efficiency (LE%), particle diameter and polydispersity index (PDI) were used as indexes to investigate several single influence factors. The results were shown in Table 1s and the EE% and LE% of drugs in different nanoformulation using the optimal parameters were shown in Table2s.

Table 1s Preparation optimization of drug loaded nanoparticles.

|                        |                                              | LE%   | EE%    | Diameter(nm) | PDI   |
|------------------------|----------------------------------------------|-------|--------|--------------|-------|
| Organic solvents       | Acetone                                      | 4.23  | 42.56  | 100.7        | 0.280 |
|                        | Acetone:CH <sub>2</sub> Cl <sub>2</sub> =1:1 | 8.54  | 85.38  | 112.3        | 0.096 |
|                        | CH <sub>2</sub> Cl <sub>2</sub>              | 8.62  | 86.16  | 131.1        | 0.204 |
| PLGA concentration     | 5mg/ml                                       | 8.54  | 85.38  | 112.3        | 0.096 |
|                        | 10mg/ml                                      | 6.25  | 62.54  | 119.0        | 0.141 |
|                        | 15mg/ml                                      | 5.96  | 59.583 | 138.1        | 0.150 |
|                        | 20mg/ml                                      | 6.35  | 63.47  | 144.1        | 0.184 |
| Drug loading ratio     | 10:1                                         | 8.54  | 85.38  | 112.3        | 0.096 |
|                        | 5:1                                          | 17.02 | 85.12  | 111.3        | 0.252 |
|                        | 2:1                                          | 33.83 | 65.66  | 100.5        | 0.258 |
| Oil/water ratio        | 1:10                                         | 1.64  | 16.35  | 134.9        | 0.173 |
|                        | 1:5                                          | 8.54  | 85.38  | 112.3        | 0.096 |
|                        | 1:4                                          | 5.09  | 50.89  | 106.1        | 0.229 |
|                        | 1:2                                          | 5.94  | 59.43  | 163.7        | 0.223 |
| PVA concentration      | 0.5%                                         | 5.79  | 57.89  | 134.9        | 0.173 |
|                        | 1.0%                                         | 8.54  | 85.38  | 112.3        | 0.096 |
|                        | 1.5%                                         | 5.79  | 57.89  | 108.6        | 0.396 |
|                        | 2%                                           | 4.68  | 46.82  | 60.9         | 0.323 |
|                        | 3%                                           | 5.32  | 53.24  | 108.5        | 0.528 |
| Ultrasonic power       | 95w                                          | 3.19  | 31.89  | 125.8        | 0.253 |
|                        | 142.5w                                       | 2.61  | 26.11  | 144.2        | 0.253 |
|                        | 190w                                         | 8.54  | 85.38  | 112.3        | 0.096 |
|                        | 237.5w                                       | 4.54  | 45.40  | 157.1        | 0.317 |
|                        | 285w                                         | 5.38  | 53.79  | 130.8        | 0.271 |
| Ultrasound time        | 5min                                         | 5.99  | 59.89  | 163.4        | 0.232 |
|                        | 8min                                         | 4.44  | 44.41  | 138.9        | 0.155 |
|                        | 10min                                        | 3.07  | 30.71  | 140.6        | 0.221 |
|                        | 15min                                        | 8.54  | 85.38  | 112.3        | 0.096 |
|                        | 18min                                        | 6.33  | 63.31  | 105.9        | 0.252 |
| M <sub>w</sub> of PLGA | 10000                                        | 8.54  | 85.38  | 112.3        | 0.096 |
|                        | 20000                                        | 8.12  | 81.15  | 176.4        | 0.230 |

Table 2s. The EE% and LE% of drugs in nanoformulations.

|        | DOX       |            | ICG       |            |
|--------|-----------|------------|-----------|------------|
|        | LE%       | EE%        | LE%       | EE%        |
| DNPs   | 8.54±0.24 | 85.38±2.39 | /         | /          |
| DRNPs  | 6.61±0.22 | 64.91±2.11 | /         | /          |
| DINPs  | 3.93±0.12 | 81.49±2.41 | 4.09±0.27 | 83.23±1.74 |
| DIRNPs | 2.98±0.07 | 61.78±1.37 | 3.07±0.18 | 62.41±3.73 |
| INPs   | /         | /          | 8.69±0.99 | 86.90±6.12 |

**FA modification efficiency.** Coupling efficiency of folic acid on the surface of RBC membrane was analyzed using fluorescence spectrophotometry. FA coupling efficiency was calculated using the following equations:  $CE\% = (M_{FA} - M_{filtrate}) / M_{FA} \times 100\%$  (where  $M_{FA}$  = the amount of added FA,  $M_{filtrate}$  = the amount of FA in filtrate after ultrafiltration). The FA coupling efficiency versus ligand amount curve was shown in Figure1s.

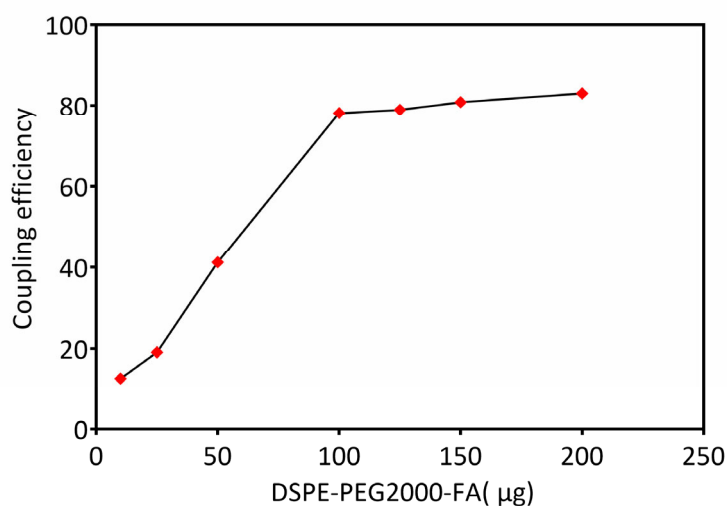

Figure 1s The FA coupling efficiency versus ligand amount curve.

**Centrifugal and turbulence stability of different nanoformulations.** Centrifugal stability and turbulence stability were evaluated by analyzing drug leakage under different test conditions. For centrifugal stability study, DIRNPs was centrifuged at 1000, 4000, 8000, 12000 rpm for 10 min. The turbulence stability was assessed by passing samples through 1ml needle with different times (5, 10, 15, 20 and 25 times).

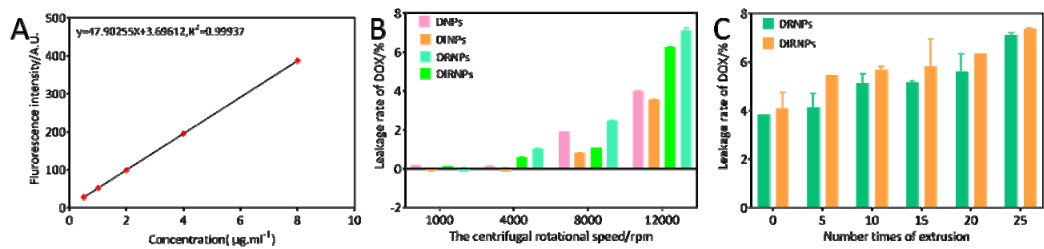

Figure 2s. (A) Standard curve of DOX. (B) Centrifugation stability of DOX loaded nanoformulations. (C) Turbulence stability DOX loaded nanoformulations

**Hemolysis test.** Hemolysis test and were performed to assess the biocompatibility of DIRNPs. Briefly, red blood cells were obtained by centrifuging the rabbit blood at 4000 rpm for 10 min and diluted with 0.9% saline to prepare 2% RBC suspension. Hemolysis was observed by adding different volume of DIRNPs sample into 2ml RBC suspension at 37 °C for 4 hours.

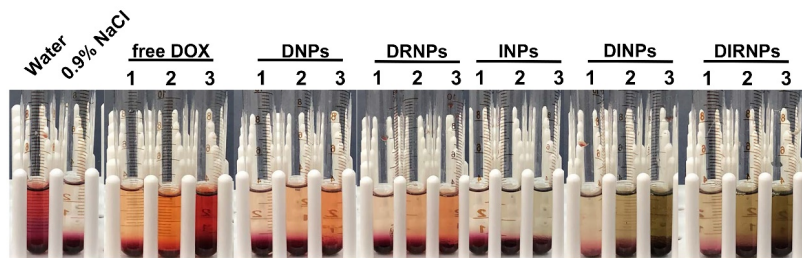

Figure 3s. Hemolysis test of different nanoformulations in 2% rabbit red blood cell solution (1, 2, 3 represents low, medium and high drug concentration, respectively).

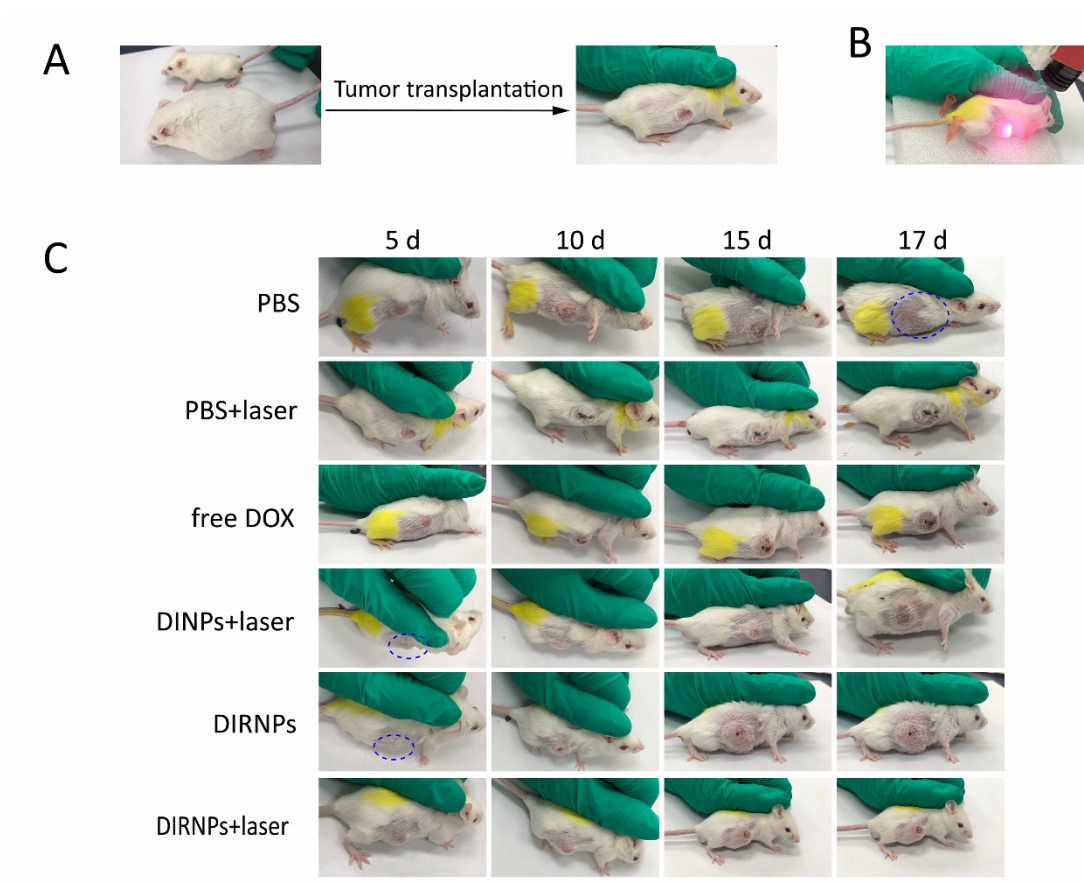

Figure 4s (A) The construction of H22 tumor-bearing mice. (B) The process of laser therapy in tumor-bearing mice. (C) Tumor growth of different test groups during treatment.
